# Supplementary material for: Competing endogenous RNA expression profiling in pre-eclampsia identifies hsa_circ_0036877 as a potential novel blood biomarker for early pre-eclampsia
Source: PubMed Central journal article supplement (PMC5891938; doi:10.1186/s13148-018-0482-3), 2018-04-10
Supplement: 13148_2018_482_MOESM1_ESM.pdf [file 13148_2018_482_MOESM1_ESM.pdf]

**Competing endogenous RNA expression profiling in pre-eclampsia identifies hsa\_circ\_0036877 as a potential novel blood biomarker for early pre-eclampsia**

Xiaopeng Hu, Junping Ao, Xinyue Li, Huijuan Zhang, Ji Wu, Weiwei Cheng

**Additional File1**

**Table S1** The demographic characteristics of the pregnant women which 12 placentas were from. NS: non-significant difference.

| Characteristics              | Preeclampsia ( n=6 ) | normal control ( n=6 ) | p-value |
|------------------------------|----------------------|------------------------|---------|
| Age (years)                  | 31.5 ± 0.84          | 31.85 ± 0.98           | 0.5996  |
| BMI                          | 19.94 ± 1.19         | 18.82 ± 0.56           | 0.5012  |
| Gestational week at delivery | 35.85 ± 1.37         | 37.05 ± 0.31           | 0.0782  |
| Proteinuria level (g/24)     | 2.71 ± 0.15          | 0                      | <0.05   |
| Systolic pressure (mmHg)     | 168.85 ± 7.24        | 111 ± 3.01             | 0.0002  |
| Diastolic pressure (mmHg)    | 114.57 ± 3.04        | 73 ± 3.2               | <0.0001 |
| Mode of delivery             | C-section            | C-section              | NS      |
| Neonatal weight (g)          | 2515.86 ± 263.21     | 3438.33 ± 122.79       | 0.0084  |
| Neonatal Apgar score         | 10                   | 10                     | NS      |

**Table S2** The demographic characteristics of the pregnant women which blood samples were from. NS: non-significant difference.

| Characteristics                              | Preeclampsia ( n=34 ) | normal control ( n=110 ) | p-value |
|----------------------------------------------|-----------------------|--------------------------|---------|
| Gestational age at sample collection (weeks) | 24.8 ± 0.29           | 25.20 ± 0.33             | 0.1128  |
| Age (years)                                  | 31.95 ± 0.59          | 31.49 ± 0.48             | 0.4673  |
| BMI                                          | 23.46 ± 0.98          | 21.83 ± 0.65             | 0.0326  |
| Gestational week at delivery                 | 37.05 ± 0.39          | 38.93 ± 0.33             | <0.05   |
| Proteinuria level (g/24)                     | 0.85 ± 0.19           | 0                        | <0.05   |
| Systolic pressure (mmHg)                     | 142.87 ± 2.32         | 111.38 ± 2.42            | <0.0001 |
| Diastolic pressure (mmHG)                    | 93.76 ± 1.33          | 75.43 ± 1.66             | <0.0001 |
| Cesarean section (n, %)                      | 34 (100%)             | 36 ( 32.7%)              | <0.05   |
| Neonatal weight (g)                          | 3023.72 ± 125.44      | 3517.21 ± 58.1           | 0.0156  |
| Neonatal Apgar score                         | 10                    | 10                       | NS      |

Table S3 The top 10 differentially expressed circRNAs in placenta of PE using microarray analyses

| Probe Name       | T tests p-value | foldchange(abs) | regulation |
|------------------|-----------------|-----------------|------------|
| hsa_circ_0055724 | 0.000227321     | 128.5154389     | down       |
| hsa_circ_0049730 | 5.96009E-06     | 49.29300736     | down       |
| hsa_circ_0001235 | 0.00014308      | 47.80985682     | down       |
| hsa_circ_0063523 | 6.95103E-06     | 46.52517171     | down       |
| hsa_circ_0063517 | 8.95065E-05     | 45.91681164     | down       |
| hsa_circ_0036474 | 0.00965258      | 20.59466442     | up         |
| hsa_circ_0065978 | 0.000386662     | 18.43054206     | up         |
| hsa_circ_0048228 | 0.000873199     | 12.61106156     | up         |
| hsa_circ_0024693 | 4.45253E-05     | 12.46826075     | up         |
| hsa_circ_0008726 | 0.000927737     | 12.27566982     | up         |

Table S4 Oligonucleotide primer sequences for qRT-PCR.

|                  | Forward                  | Reverse                |
|------------------|--------------------------|------------------------|
| <i>Chd5</i>      | CTCAAGGCTGACGTGTTCAA     | AGTGCCTCAAAGTTCGGTGT   |
| <i>Furin</i>     | CCGCAGATGGGTTTAATGAC     | GGTCAGCGTCCCATAGTTGT   |
| lnc-ELAVL4-9:1   | TCTCATTTGGACCAGCCTCT     | CTGTGGTTGCCAGCATAGTG   |
| lnc-RAP1GAP2-5:2 | TATGGTGACCTCCTGGGAAC     | GTTTGAGCTGGGAAGTCGAG   |
| hsa_circ_0036877 | TTTGTAAGATGCTGGGTTGGTG   | ACTGCATCTGTCACCTCGC    |
| hsa_circ_0036878 | AAACGTGCAGACTATGCAAACC   | ATACTGTTGGTGTAGCCGTCG  |
| hsa_circ_0055724 | AGCCACAGAAATAAAGGATGGAGA | TCTGAGAAGACTGGATTGCTA  |
| hsa_circ_0049730 | CCAGTCCCTACAACACCTCA     | GTAGACTGGAAGGAGGCAAT   |
| hsa_circ_0036474 | AGACTGTTTGAATCTTGCTCACT  | TACGATCAATCACCATGGCAAC |
| <i>Gapdh</i>     | CAGGAGGCATTGCTGATGAT     | GAAGGCTGGGGCTCATT      |

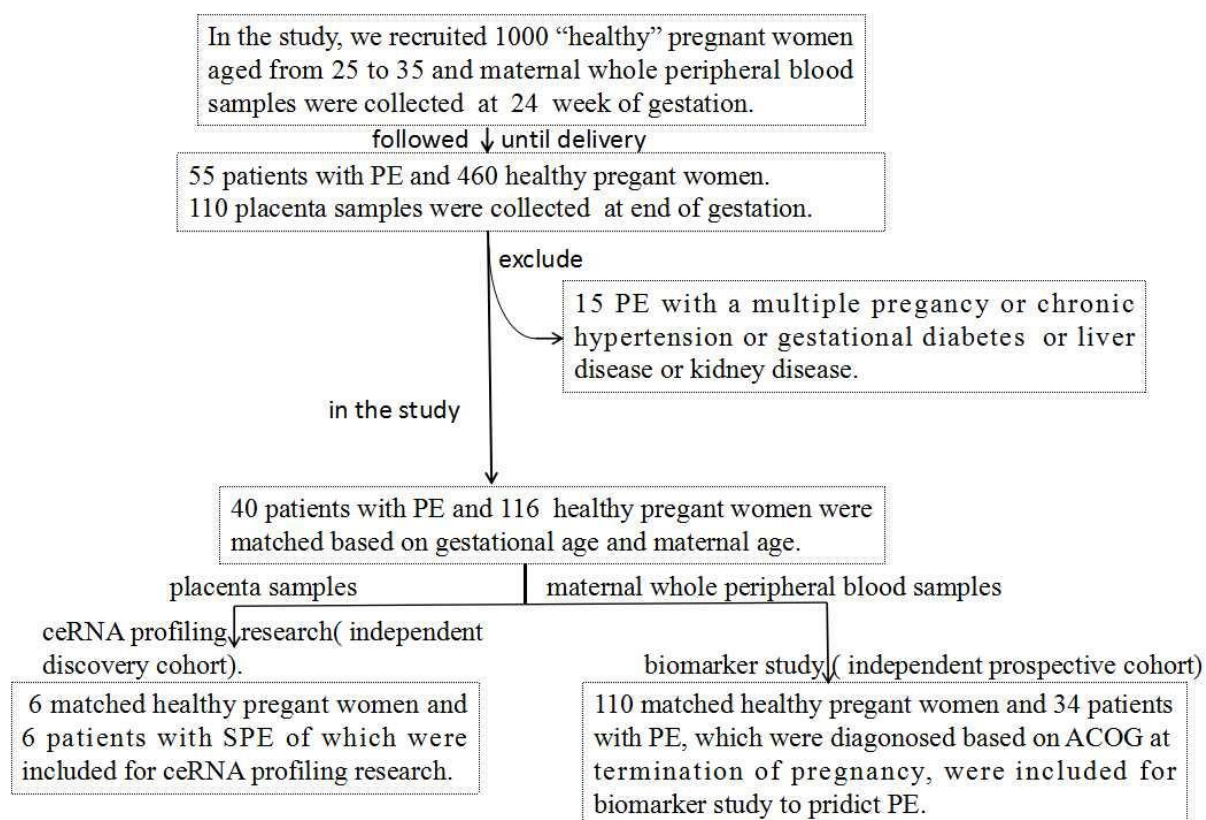

**Supplement Fig.1**

**Supplement Fig.1: study design.** This was a prospective cohort nest study and divided into two phases: ceRNA profiling research (discovery research) and biomarker study (prospective development research).

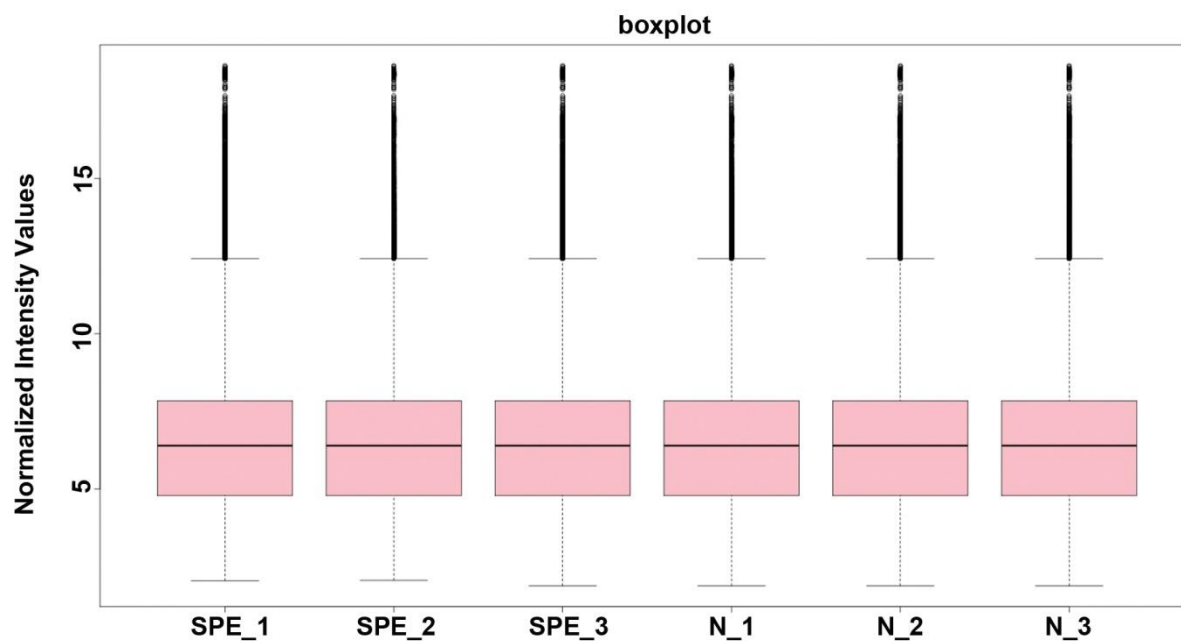

**Supplement Fig.2**

**Supplement Fig.2: The variability between controls in microarray vs variability between PE samples was shown in BOX plot.** Box plot showed the normalized intensities from SPE and N placenta tissues samples.

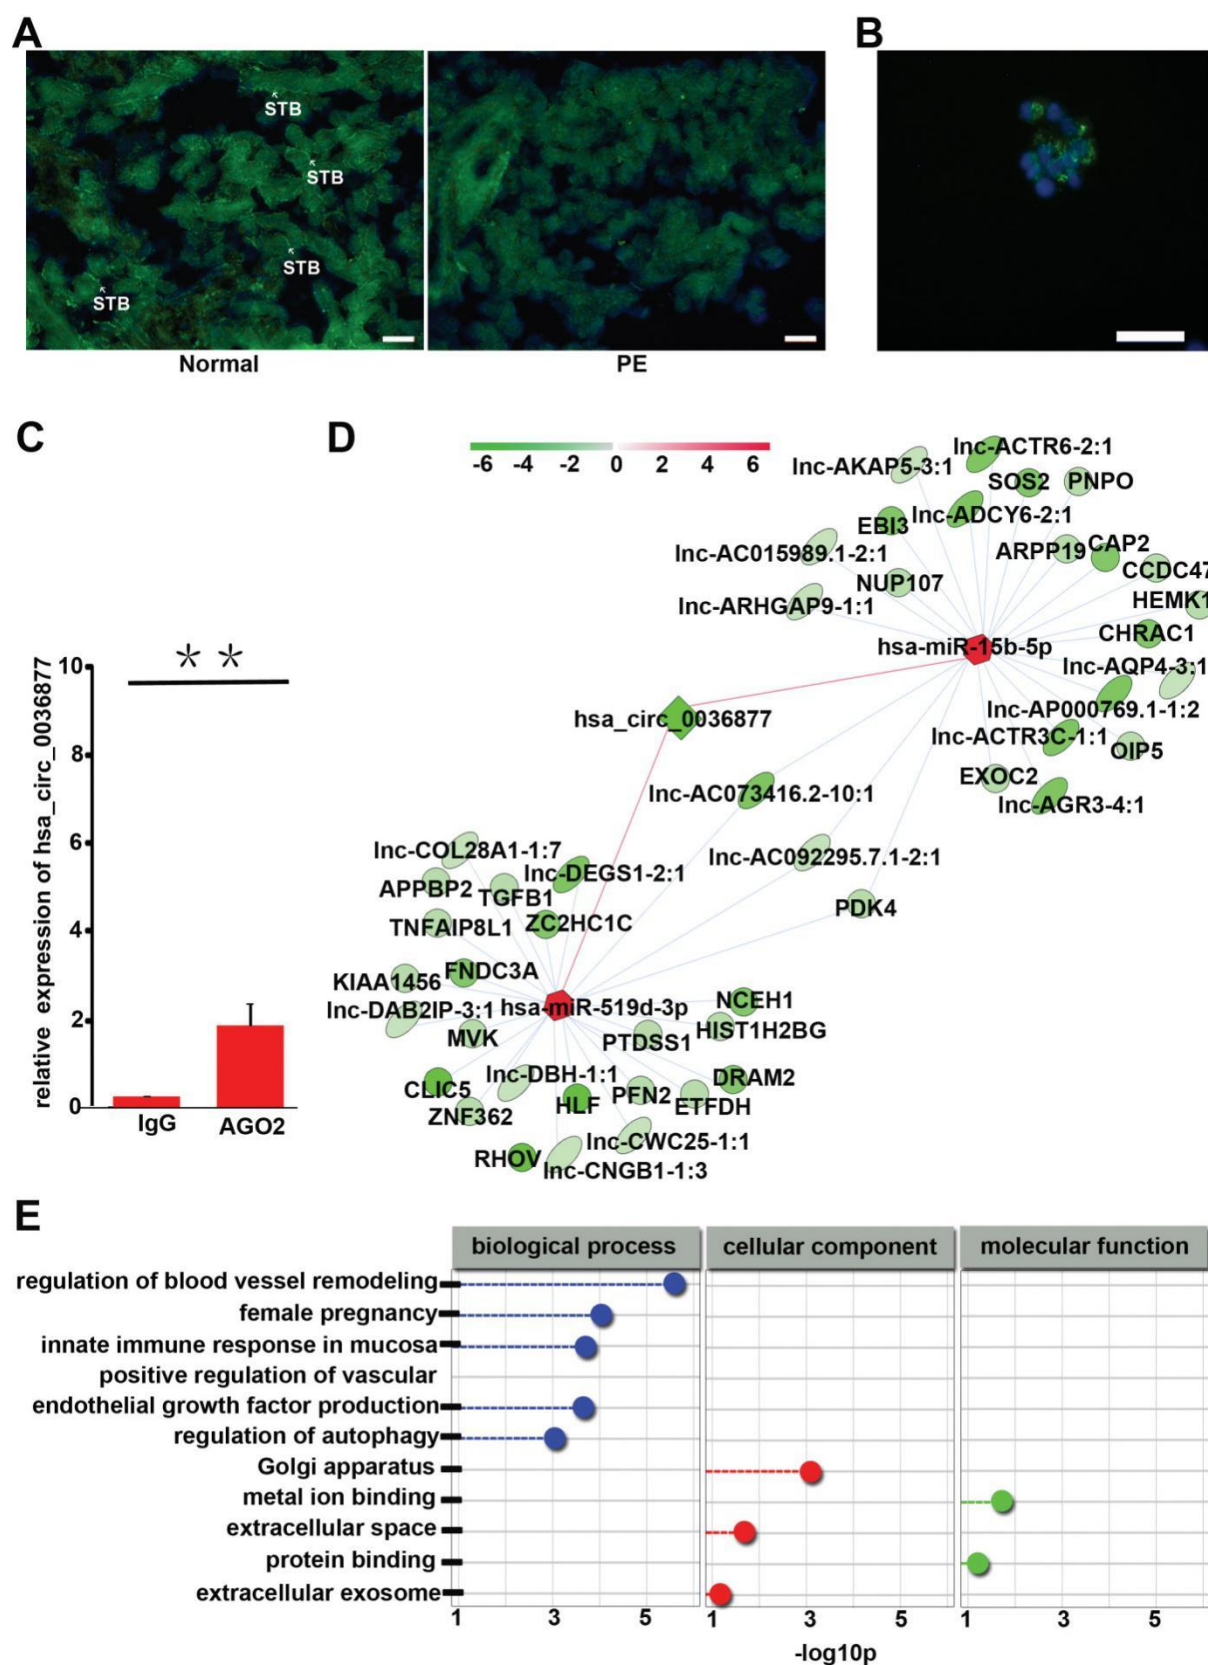

Supplement Fig.3

---

**Supplement Fig .3: Hsa\_circ\_0036877 can function as a ceRNA in the PE placenta.**

The expression of hsa\_circ\_0036877 in placenta of patients with PE (A) and htra-8 cells (B) was investigated by RNA FISH. The green is positive expression and blue is DAPI. (C) AGO2 or rabbit IgG RNA immunoprecipitation (RIP) assays were performed in htra-8 cells. Then using qRT-PCR, the amount of hsa\_circ\_0036877 which AGO2 or rabbit IgG combined with was determined. Data are the means  $\pm$  s.e.m. of three experiments;  $**P < 0.001$ . (D) A portion of the theoretical ceRNA network of hsa\_circ\_0036877 in PE according to microarray analysis and report data was predicted. The color bar, which increases from green to red comparing SPE samples with matched normal controls, indicates mRNA, lncRNA, and circRNA expression levels. (E) GO biological processes of the above module were involved in the pathogenesis of PE. Blue nodes represent biological processes, red nodes represent cellular components, and green nodes represent molecular functions. P-values were calculated by the hypergeometric test and corrected using the Benjamini-Hochberg adjustment. P-values are expressed as negative logarithms (base 10).

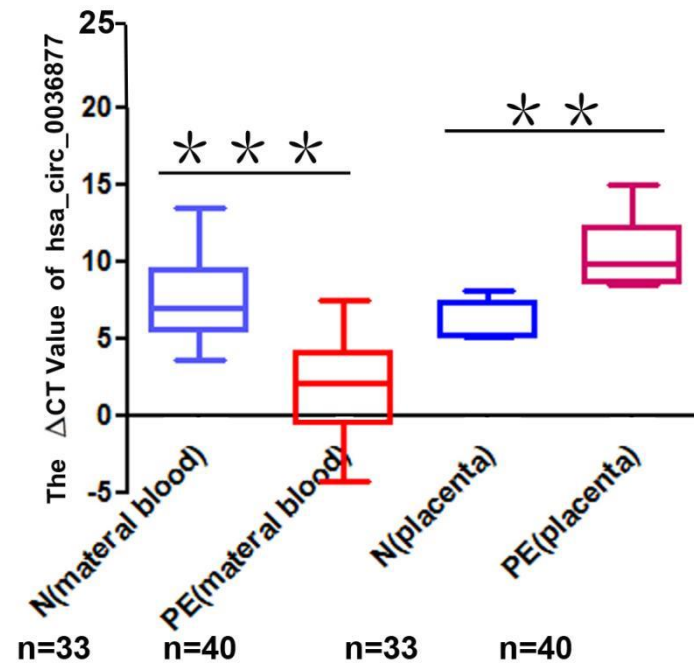

Supplement Fig.4

Supplement Fig.4 The correlation between the expression in placenta and maternal blood from the same individuals in the PE and non-PE groups. \*\* $P < 0.001$ , \*\*\* $P < 0.0001$ .
